# Supplementary material
Source: HighWire-hosted journal article supplement (https://bmjopen.bmj.com/content/6/4/e010926)
Supplement: inline-supplementary-material-1 [file inline-supplementary-material-1.pdf]

## **APPENDIX**

### ***Data sources***

#### *Hospital Information System (HIS)*

The HIS includes the patients' characteristics (the patients' identifier, gender, date and place of birth, and place of residence); admission and discharge dates; discharge diagnoses (up to 6); procedure codes (up to 6) according to the International Classification of Disease, Ninth Revision, Clinical Modification (ICD-9-CM); hospital ward(s); date(s) of in-hospital transfer; and a regional code that corresponds to the admitting facility.

#### *Mortality Information System (MIS)*

The MIS includes the patients' demographic characteristics (the patient's identifier, age, gender, place and date of birth, residence, marital status, and occupation), as well as the date, place, and cause of death (codified by ICD-9 codes).

#### *Drug claims registry (Pharm)*

Pharm registry comprises individual records for each medical prescription dispensed in public and private pharmacies within the territory of the local health authorities for the resident population. The registry is limited to those drugs prescribed for outpatient use that are reimbursed by the health care system. All the drugs in the study are included in the Pharm registry. In this registry, the drugs are identified by the national drug registry code, which refers to the international ATC classification and allows for the exact quantification of the dispensed drug. Individual patient data (the patient's identifier) and the date the drug is dispensed are reported for every prescription.

## Algorithm for selection of the cohort

ICD-9-CM codes for the identification of MI cases.

An MI was defined either as a primary diagnosis of an acute myocardial infarction (ICD-9-CM 410.xx) or as a secondary diagnosis of an MI associated with one of the following conditions as the primary diagnosis:

| <b>ICD-9-CM code</b> | <b>Condition</b>                                                   |
|----------------------|--------------------------------------------------------------------|
| 411                  | Other acute and subacute forms of ischemic heart disease           |
| 413                  | Angina pectoris                                                    |
| 414                  | Other forms of chronic ischemic heart disease                      |
| 423.0                | Haemopericardium                                                   |
| 426                  | Conduction disorders                                               |
| 427                  | Cardiac dysrhythmias, excluding 427.5 Cardiac arrest               |
| 428                  | Heart failure                                                      |
| 429.5                | Rupture of chordae tendineae                                       |
| 429.6                | Rupture of papillary muscle                                        |
| 429.71               | Acquired cardiac septal defect                                     |
| 429.79               | Certain sequelae of myocardial infarction not elsewhere classified |
| 429.81               | Other disorders of papillary muscle                                |
| 518.4                | Acute edema of lung, unspecified                                   |
| 518.81               | Acute respiratory failure                                          |
| 780.01               | Coma                                                               |
| 780.2                | Syncope and collapse                                               |
| 785.51               | Cardiogenic shock                                                  |
| 799.1                | Respiratory arrest                                                 |
| 997.02               | Iatrogenic cerebrovascular infarction or haemorrhage               |
| 998.2                | Accidental puncture or laceration during a procedure               |

## Selection of co-morbidities from hospital discharge records

| Condition                                         | ICD-9-CM codes                                                                                                                                                          |                                                                                                                                                                        |
|---------------------------------------------------|-------------------------------------------------------------------------------------------------------------------------------------------------------------------------|------------------------------------------------------------------------------------------------------------------------------------------------------------------------|
|                                                   | Index admission                                                                                                                                                         | Admissions during the 9 years prior to index admission                                                                                                                 |
| Malignant neoplasms                               | 140.0–208.9                                                                                                                                                             | 140.0–208.9                                                                                                                                                            |
| Diabetes                                          |                                                                                                                                                                         | 250.0-250.9                                                                                                                                                            |
| Disorders of lipid metabolism/obesity             |                                                                                                                                                                         | 272, 278.0                                                                                                                                                             |
| Hematologic diseases                              | 280-285, 288, 289                                                                                                                                                       | 280-285, 288, 289                                                                                                                                                      |
| Hypertension                                      |                                                                                                                                                                         | 401-405                                                                                                                                                                |
| Heart failure                                     | 428                                                                                                                                                                     | 428                                                                                                                                                                    |
| Other cardiac diseases                            | 393-398, 423 (excl. 423.0), 424, 425, 745, 746.3-746.6, V15.1, V42.2, V43.2, V43.3, V45.0                                                                               | 093.2, 391, 393-398, 420, 421, 422, 423, 424, 425, 429 (excl. 429.7),<br>745, 746.3-746.6, V15.1, V42.2, V43.2, V43.3, V45.0                                           |
| Conduction disorders                              | 426                                                                                                                                                                     | 426                                                                                                                                                                    |
| Cardiac dysrhythmias                              | 427, 785.0, 996.01, 996.04, V45.0, V53.3                                                                                                                                | 427, 785.0, 996.01, 996.04, V45.0, V53.3                                                                                                                               |
| Cerebrovascular disease                           | 430-438                                                                                                                                                                 | 430-438                                                                                                                                                                |
| Hemorrhagic stroke                                | 430, 431, 432                                                                                                                                                           | 430, 431, 432                                                                                                                                                          |
| Ischemic stroke/<br>Transient cerebral ischemia   | 433.x1, 434, 435.x, 436                                                                                                                                                 | 433.x1, 434, 435.x, 436                                                                                                                                                |
| Diseases of arteries, arterioles, and capillaries | 440-448 (excl 441.1, 441.3, 441.5, 441.6, 444)                                                                                                                          | 440-448, 557                                                                                                                                                           |
| Chronic obstructive pulmonary disease (COPD)      |                                                                                                                                                                         | 491-492, 494, 496                                                                                                                                                      |
| Chronic nephropathies                             | 582-583, 585-588, V42.0, V45.1, V56<br>procedures 38.95, 39.95, 54.98                                                                                                   | 582-588, V42.0, V45.1, V56<br>procedures 38.95, 39.95, 54.98, 55.6                                                                                                     |
| Chronic liver, pancreas, and digestive diseases   | 571-572, 577.1-577.9, 555, 556, V42.7                                                                                                                                   | 571-572, 577.1-577.9, 555, 556, 0.70, 456.0- 456.2, 570, 573, V42.7                                                                                                    |
| Gastro-oesophageal haemorrhage                    | 530.2 (2009: 530.21), 530.82, 531.0, 531.2, 531.4, 531.6, 532.0, 532.2, 533.4, 533.6, 534.0, 534.2, 534.4, 534.6, 535.01, 535.11, 535.21, 535.31, 535.41, 535.51, 578.9 | 530.2 (2009:530.21), 530.82, 531.0, 531.2, 531.4, 531.6, 532.0, 532.2, 533.4, 533.6, 534.0, 534.2, 534.4, 534.6, 535.01, 535.11, 535.21, 535.31, 535.41, 535.51, 578.9 |
